# Supplementary material for: Multi-scale in silico analysis of the phase separation behavior of FUS mutants
Source: Royal Society of Chemistry journal article supplement (doi:10.1039/d4tb01512f), 2024-01-01
Supplement: d4tb01512f1.pdf [file d4tb01512f1.pdf]

## Supporting Information

### **Multi-Scale In-silico Analysis of Phase Separation Behavior of FUS Mutants**

Kalindu S. Fernando<sup>1</sup>, Ying Chau<sup>1, \*</sup>

1. Chemical and Biological Engineering Department, The Hong Kong University of Science & Technology, Hong Kong SAR, China

\*Corresponding Author's email: keychau@ust.hk

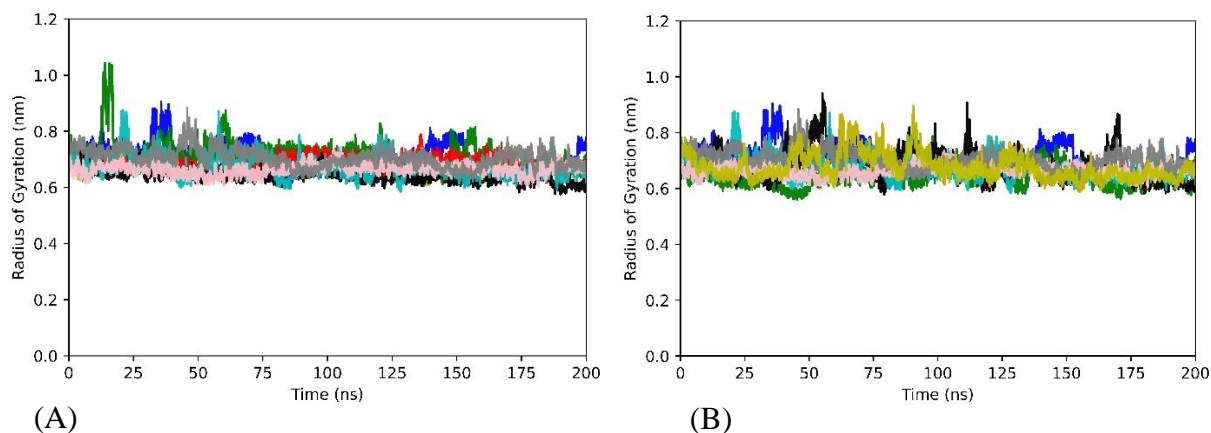

**Figure S1:** Convergence analysis of FUS mutant sticker complexes using the stability the radius of gyration of each sticker with relevant mutant sticker. (A) for G156E mutant complex with QGYEQQ (green: ATQSYG, red:SYSGYS, blue: DTSGYG, black: QNTGYG, yellow: STGGYG, purple: SSSGGG, light blue: DQSGGG,gray: GSGGYG, orange:GRGGSG, light yellow:RGGGRRG, light green:GRGGMG, dark green:FVQGYG, dark red: GRGGRG, teal:RRGGRG, violet:GYRGRG, pink:DRGGFG)and (B) for R244C mutant complex with CGGGRG(green: ATQSYG, red:SYSGYS, blue: DTSGYG, black: QNTGYG, yellow: STGGYG, purple: SSSGGG, light blue: DQSGGG,gray: GSGGYG, orange:GRGGSG, light, light green:GRGGMG, dark green:FVQGYG,dark red:GRGGRG, teal:RRGGRG, violet:GYRGRG, pink:DRGGFG)

### G156E mutation stickers

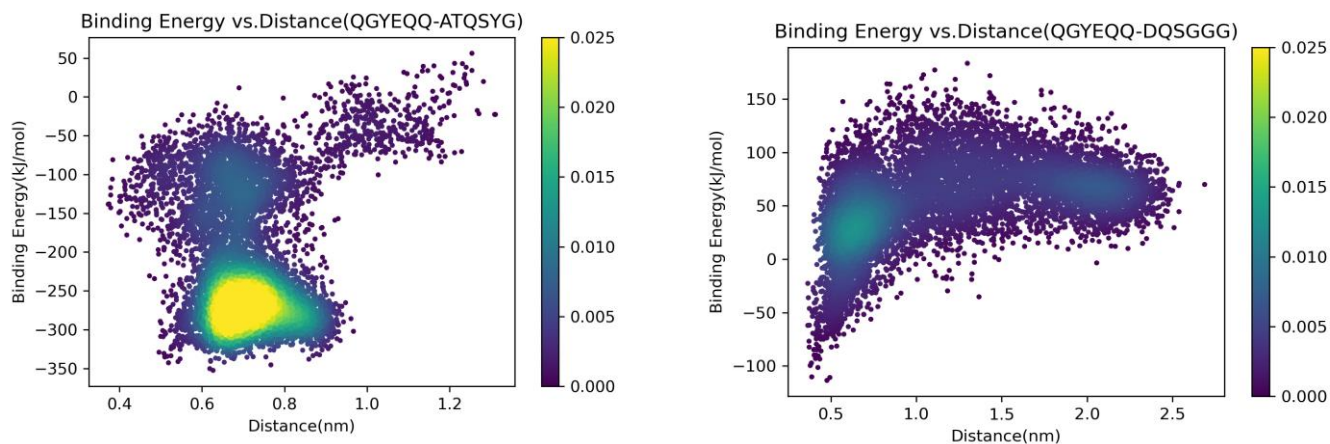

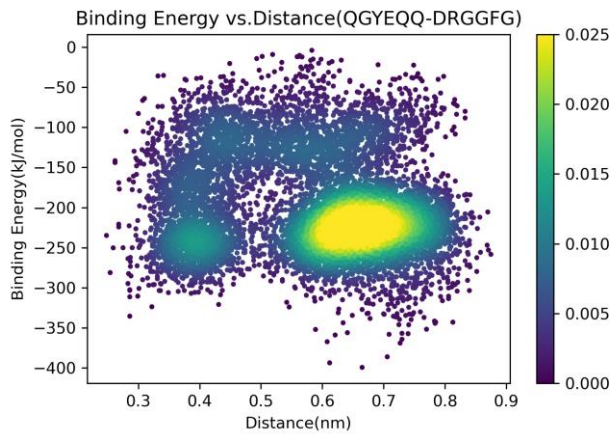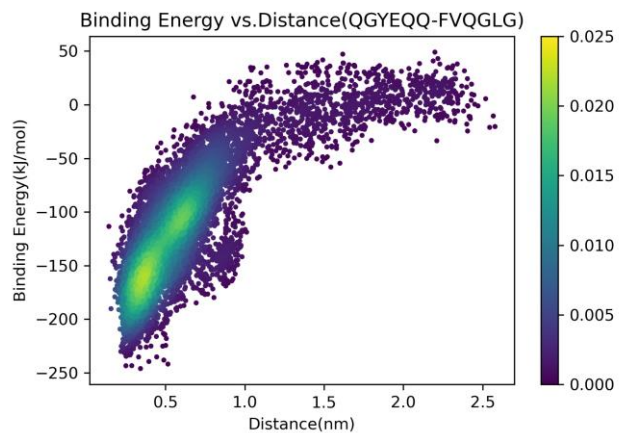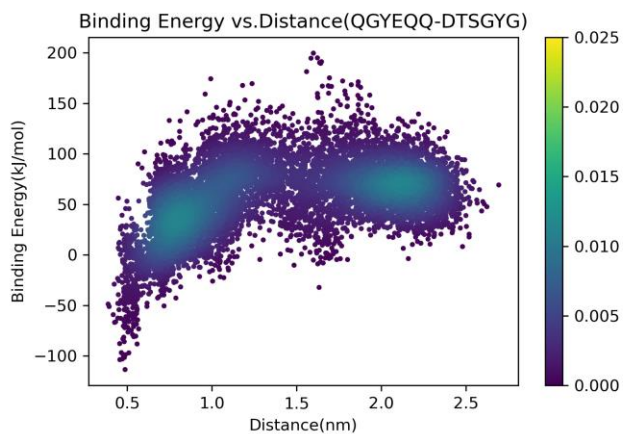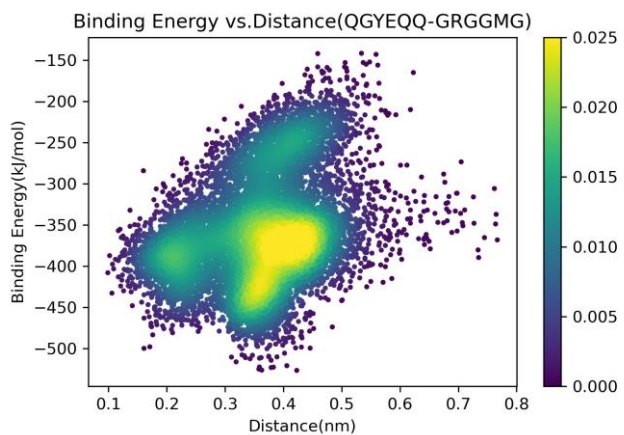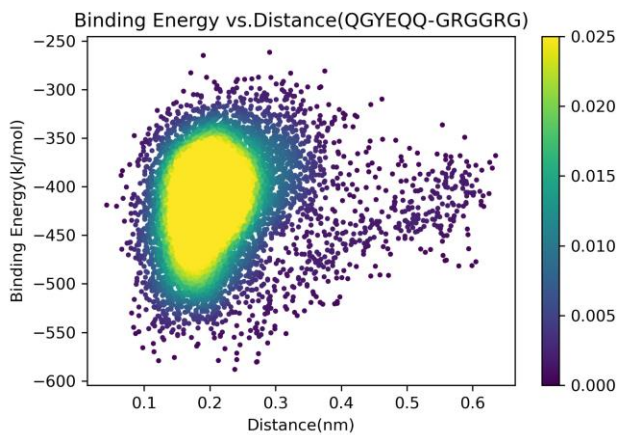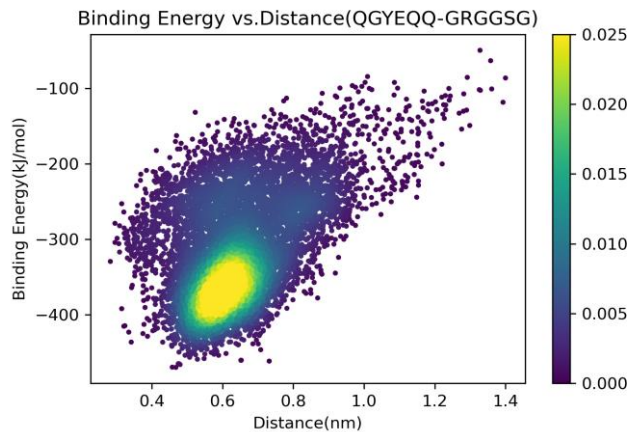

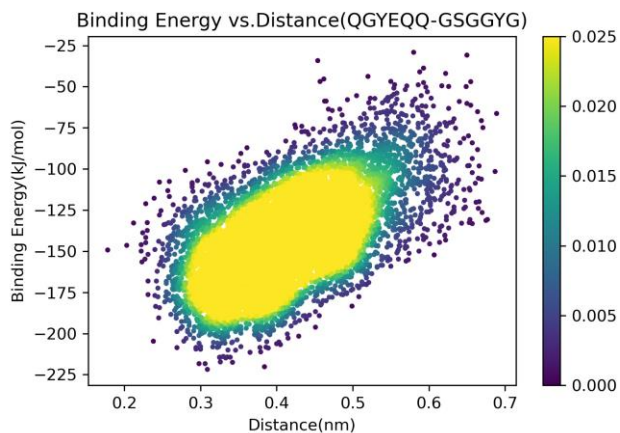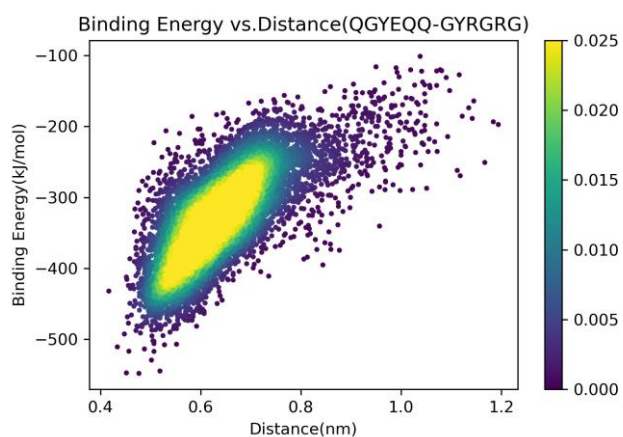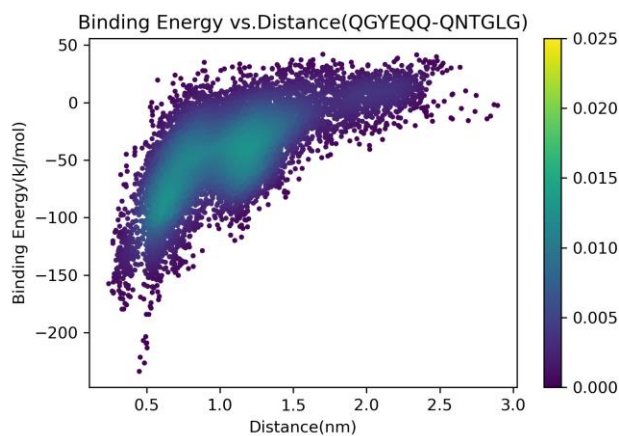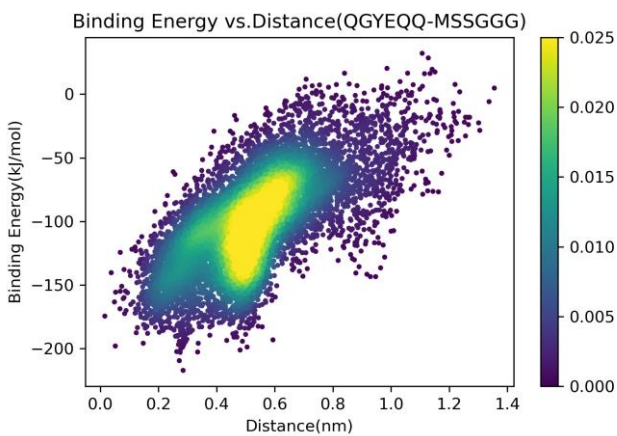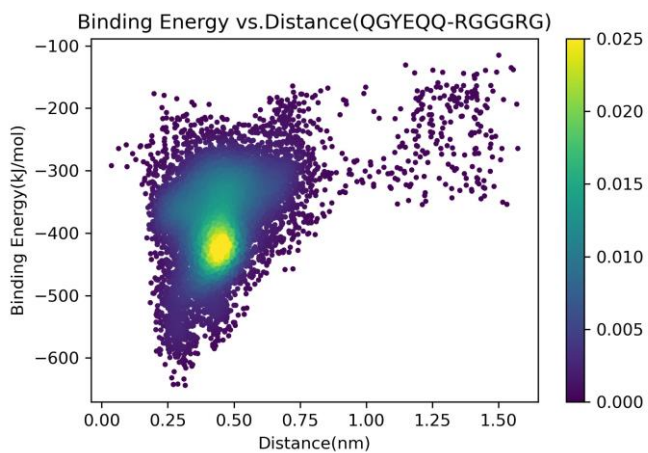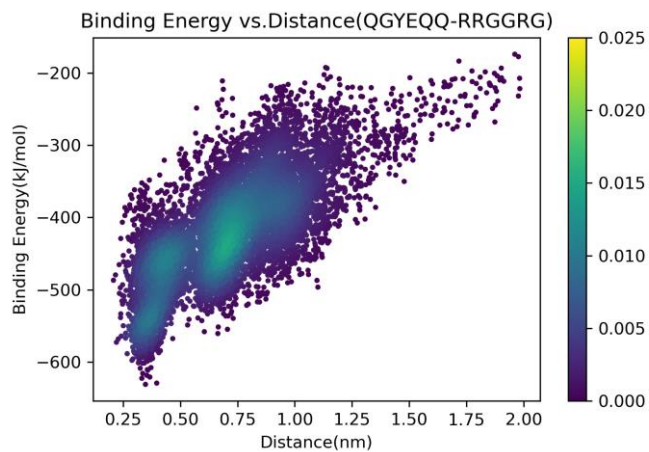



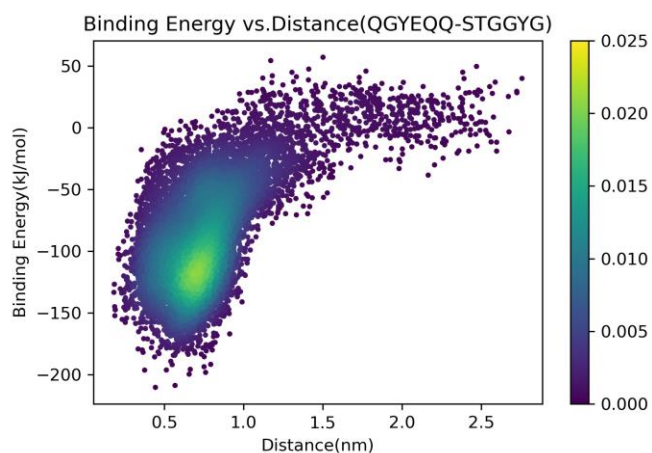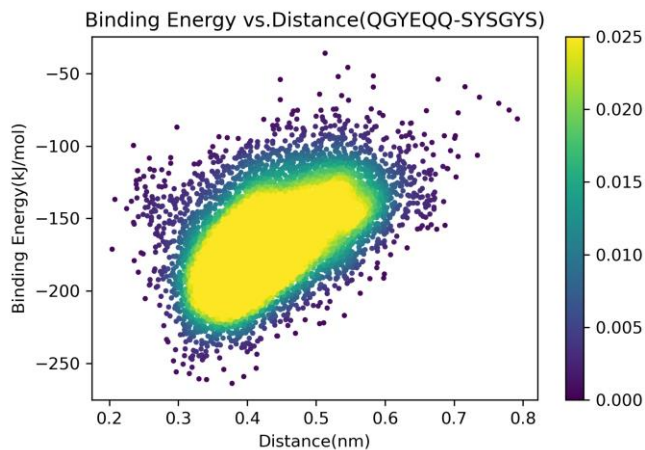

**Figure S2:** Homotypic binding energy distribution calculated by MMPBSA method using AA-MD simulation trajectories of 200 ns at 300K temperature of stickers (LARKS) extracted from LARKSdb as a function of centroid distance between a pair of hexapeptides for G156E mutation.

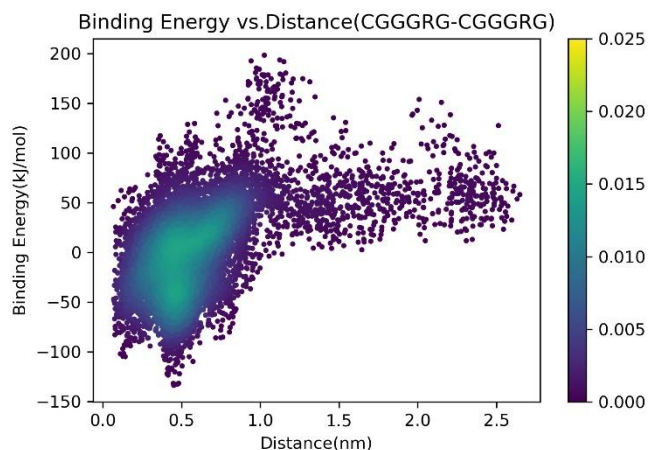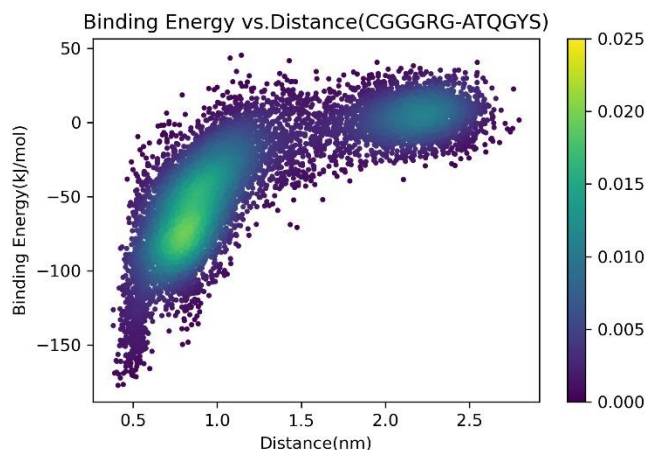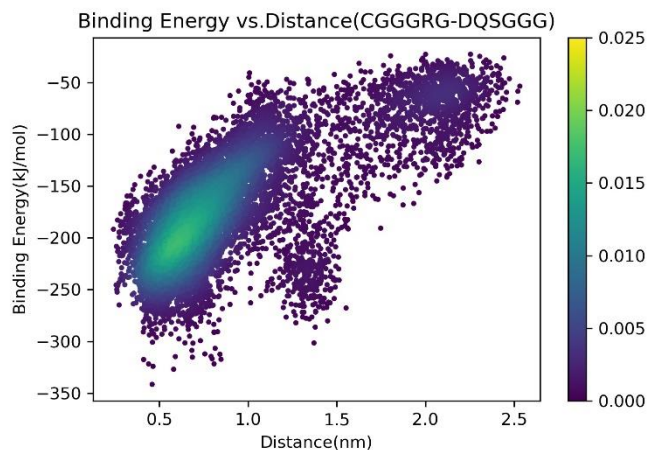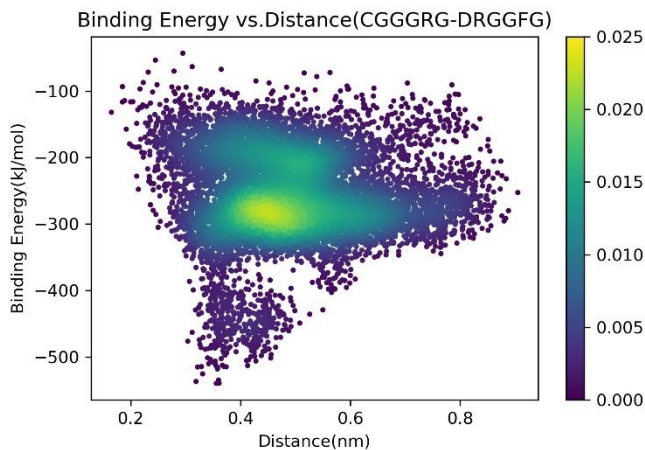

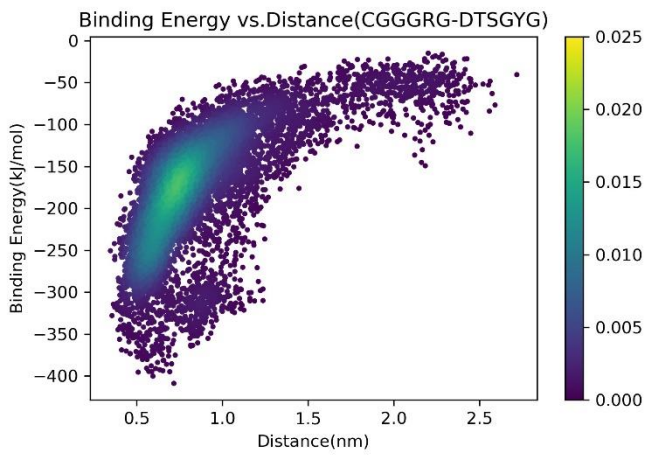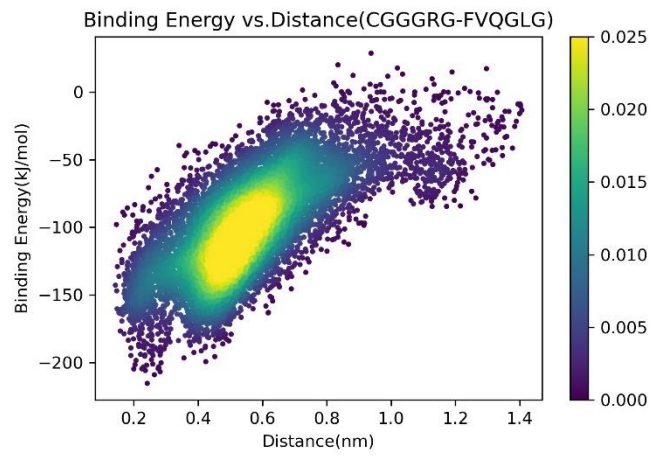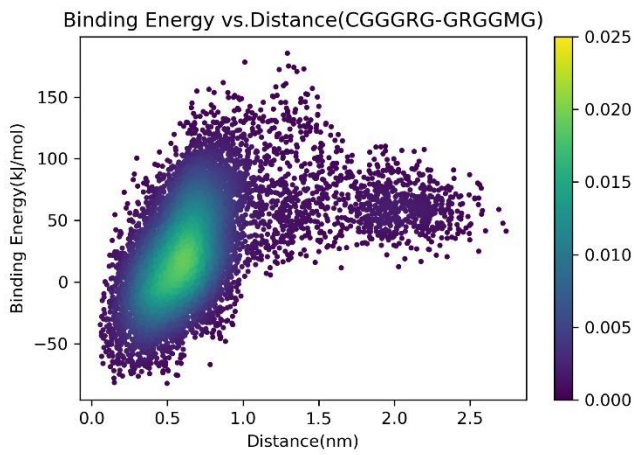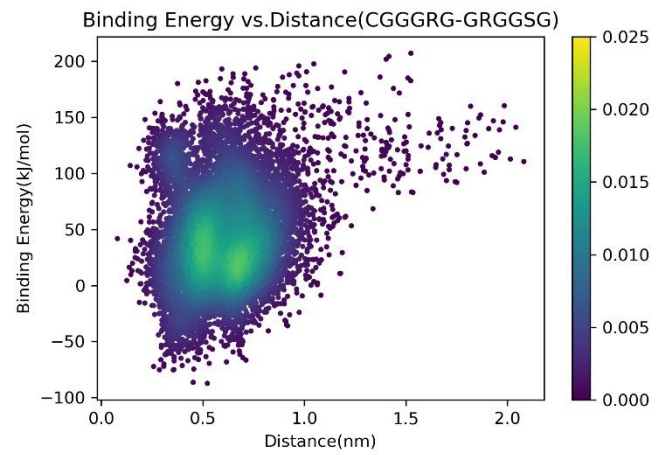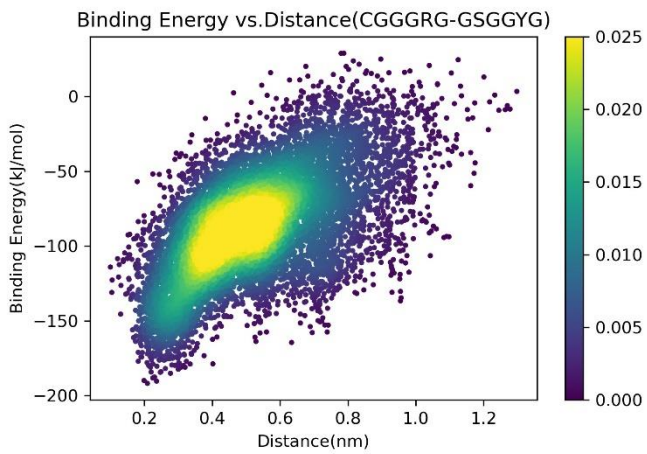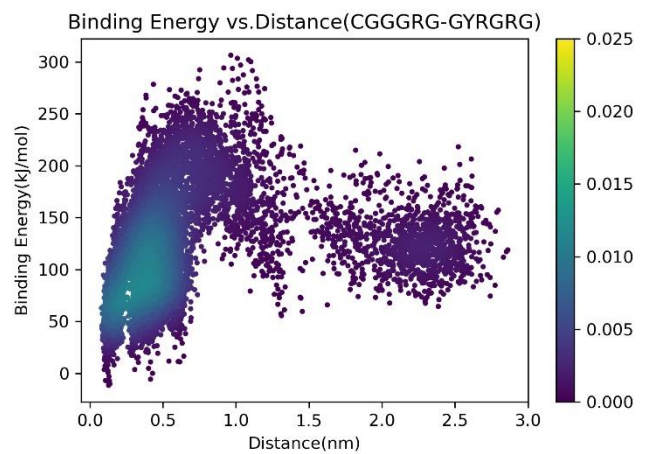

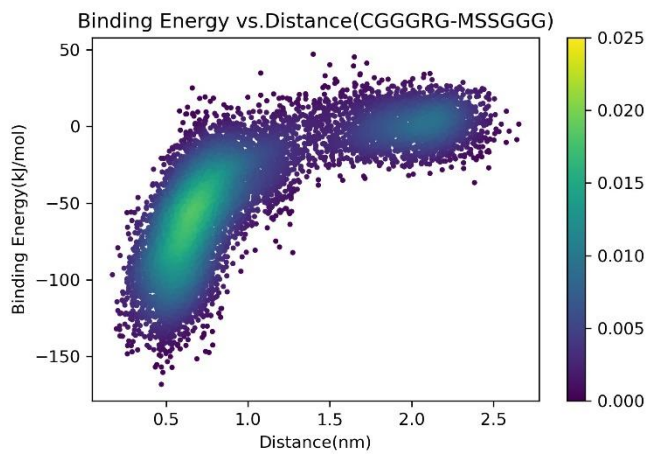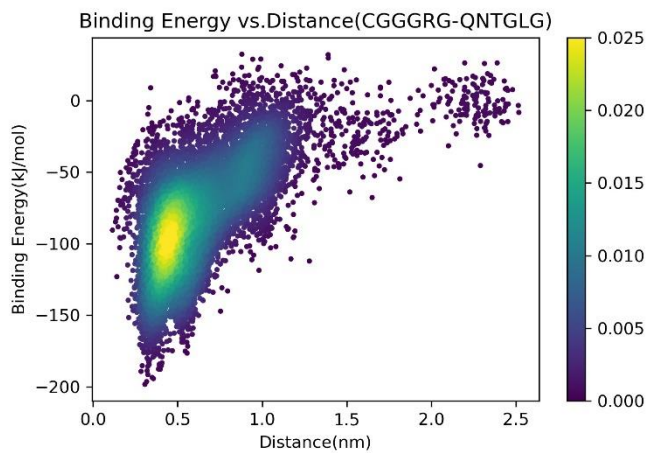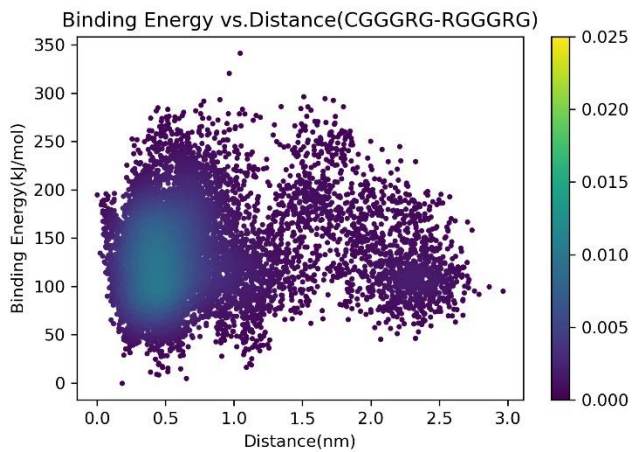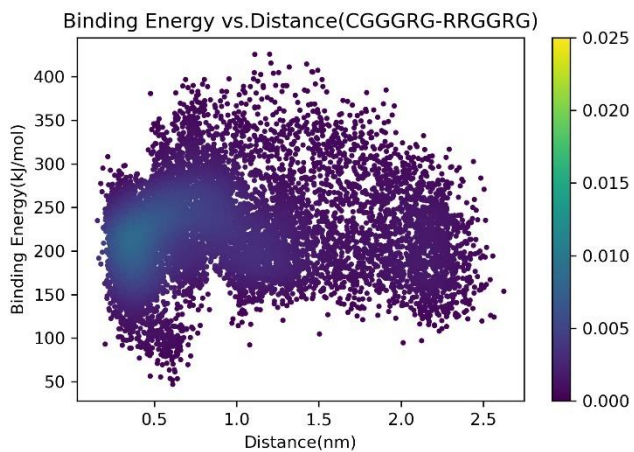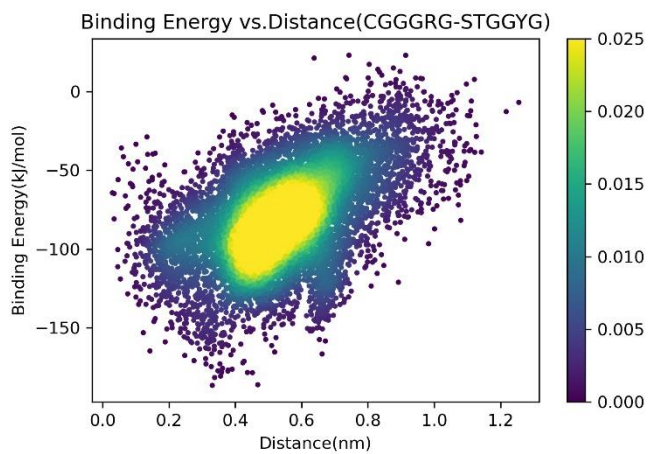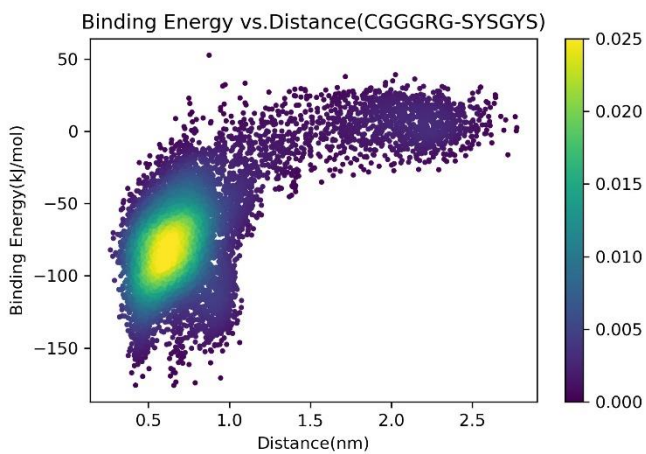



**Figure S3:** Homotypic binding energy distribution calculated by MMPBSA method using AA-MD simulation trajectories of 200 ns at 300K temperature of stickers (LARKS) extracted from LARKSdb as a function of centroid distance between a pair of hexapeptides for R244C mutation.

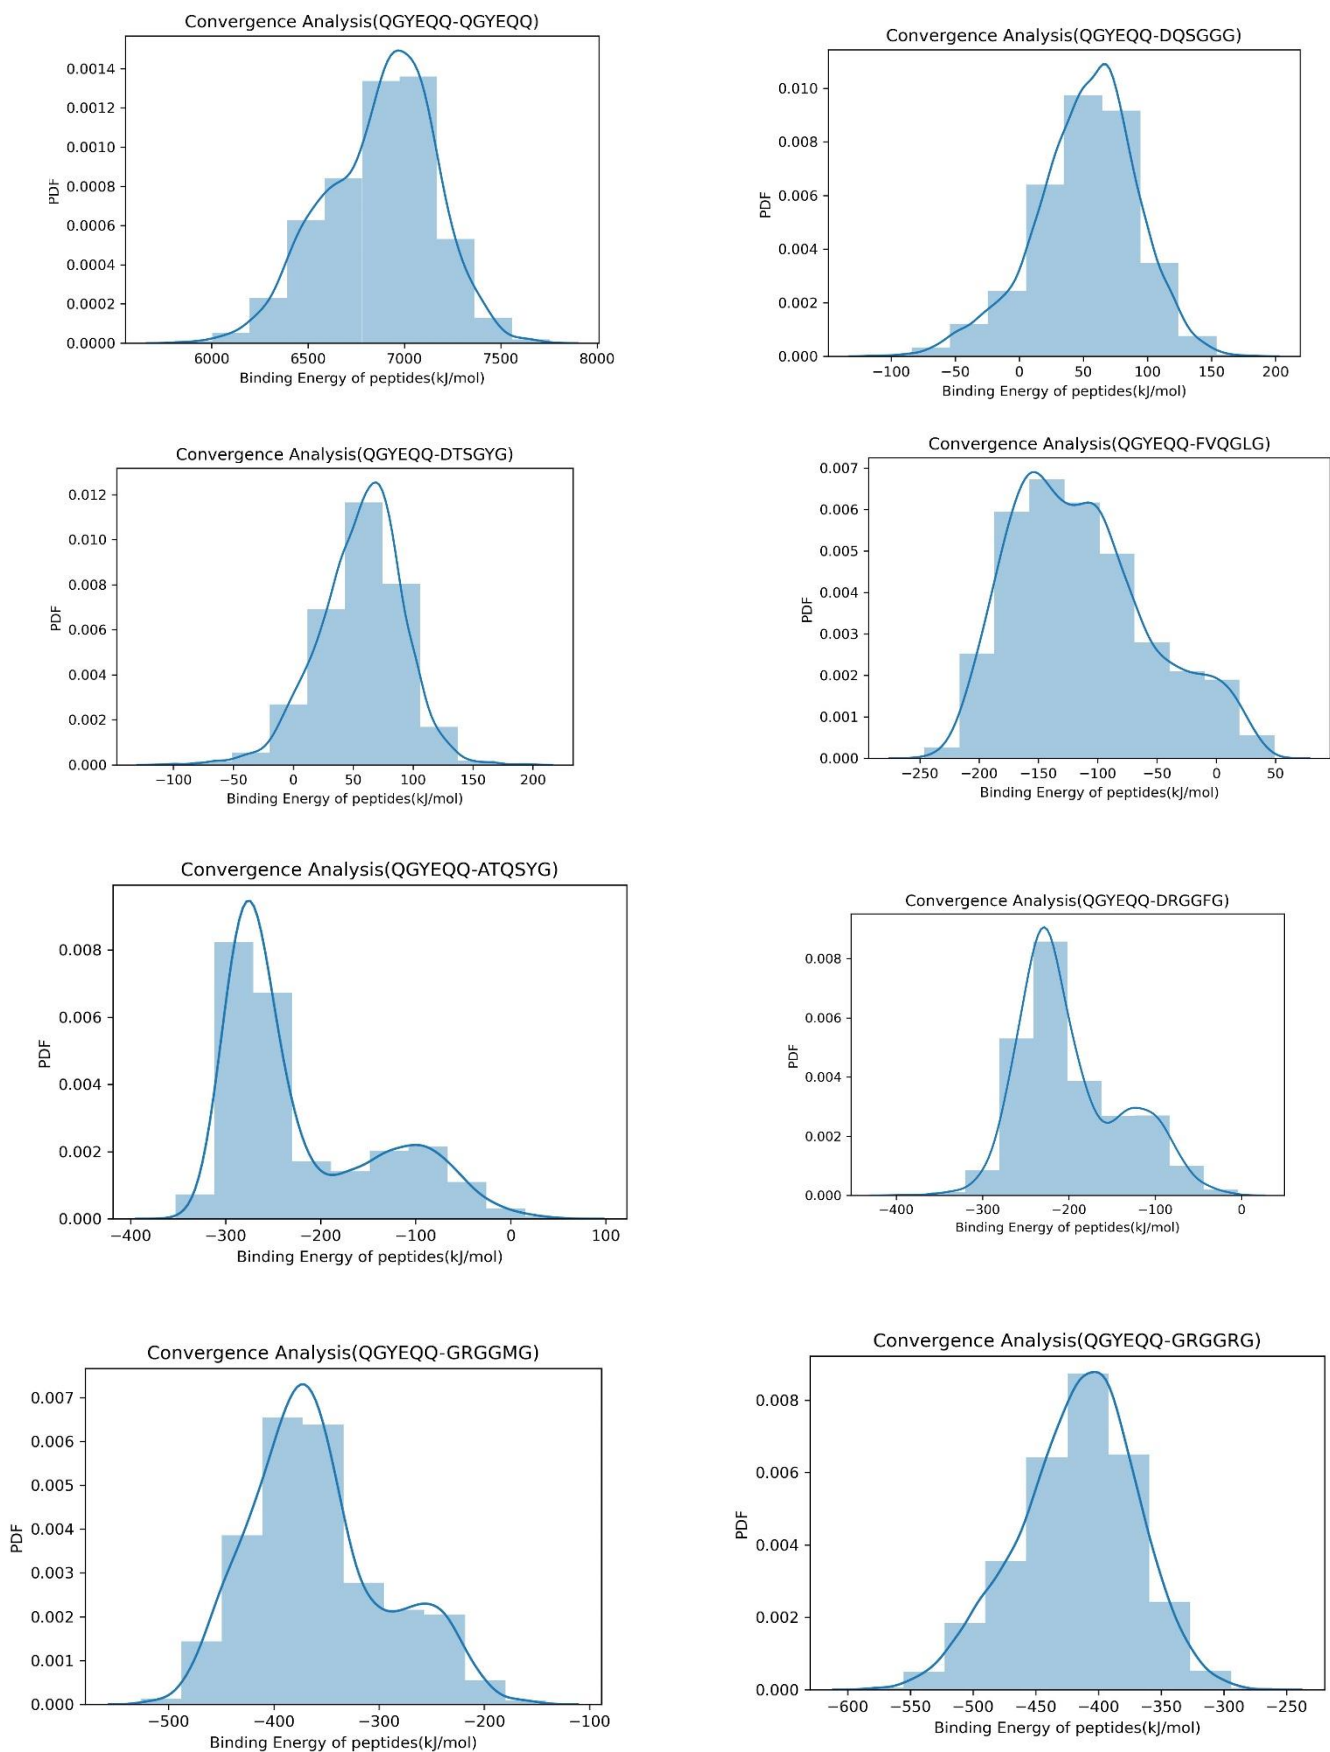



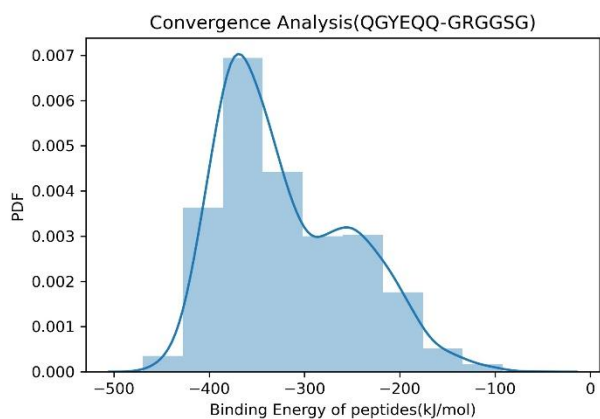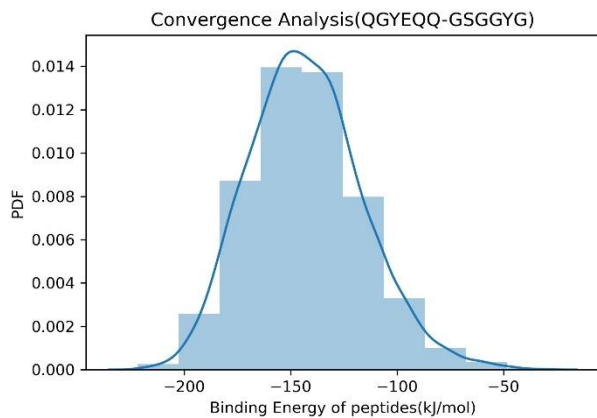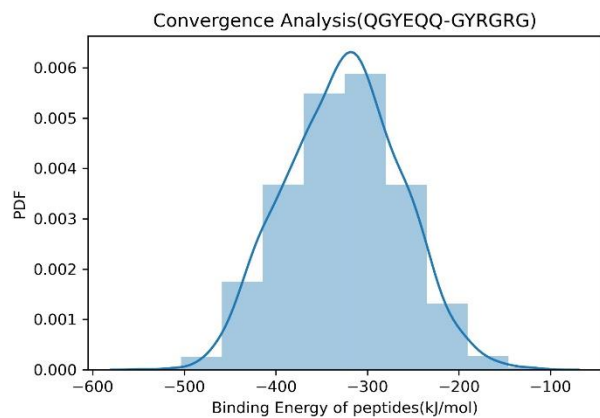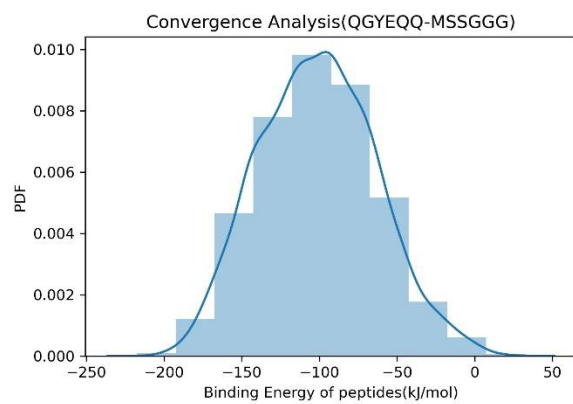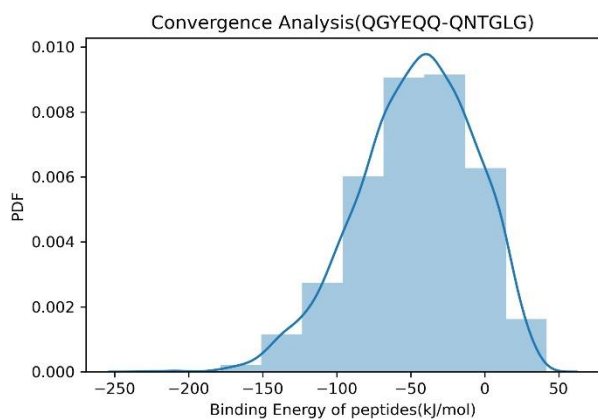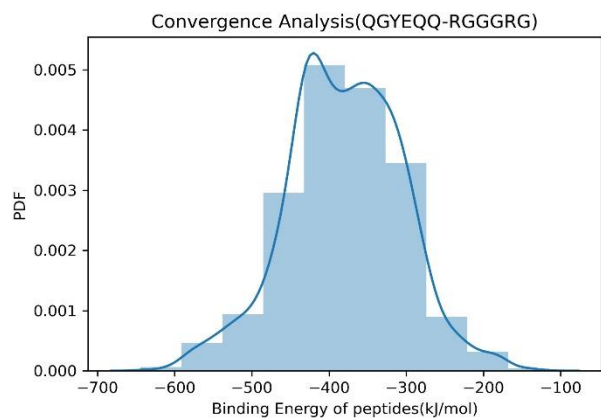

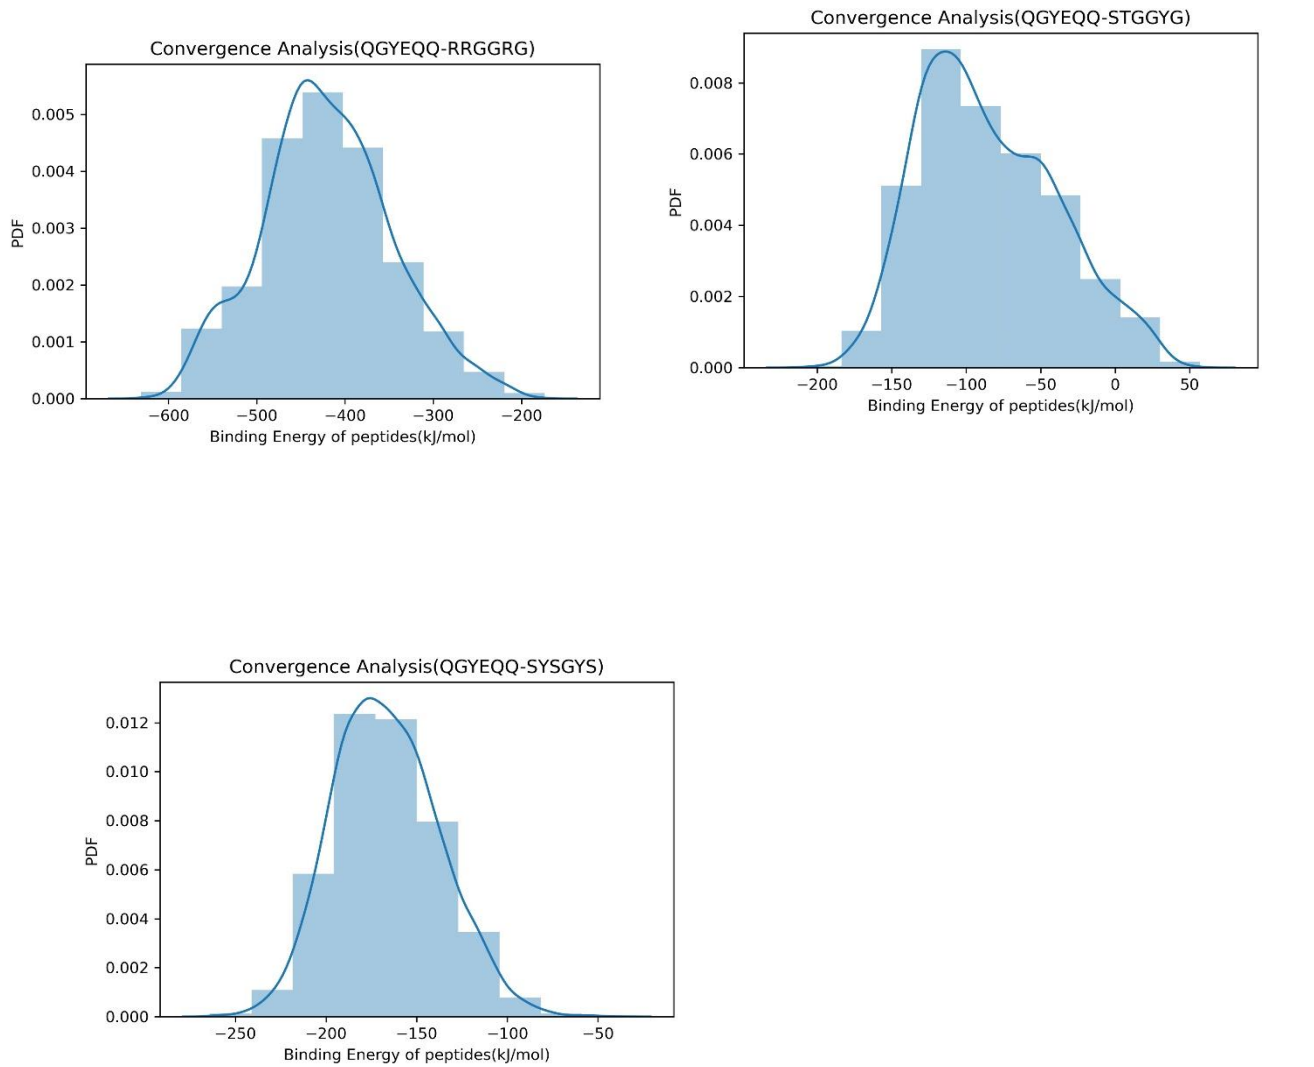

**Figure S4:** Histogram analysis of binding energy distribution of stickers estimated for G156E mutation

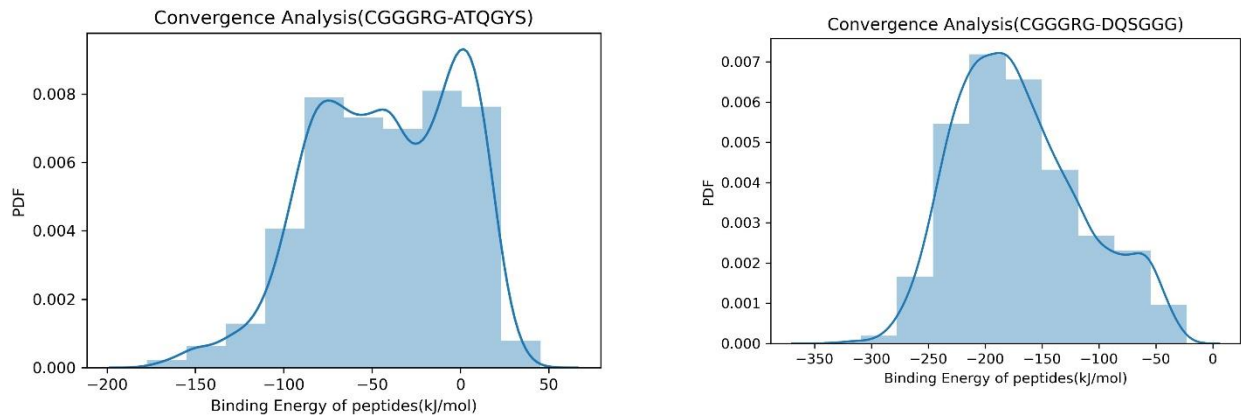

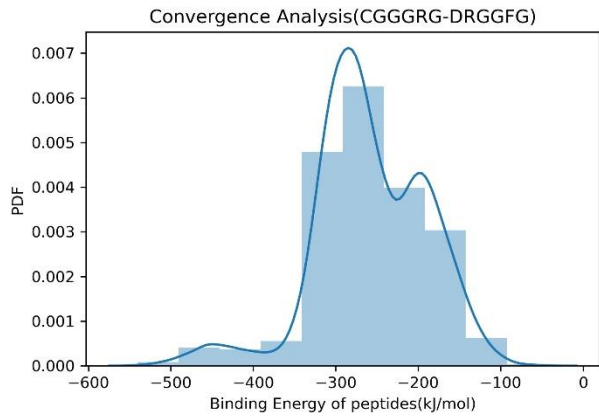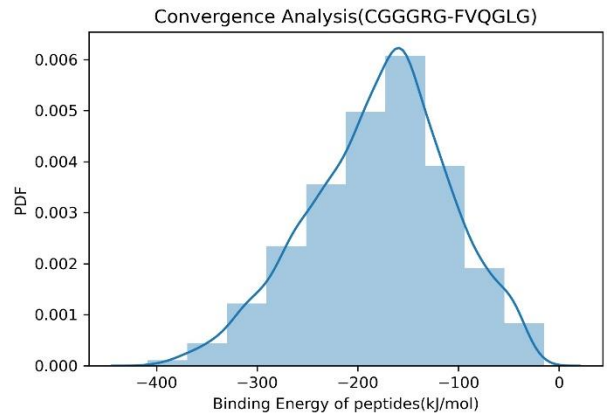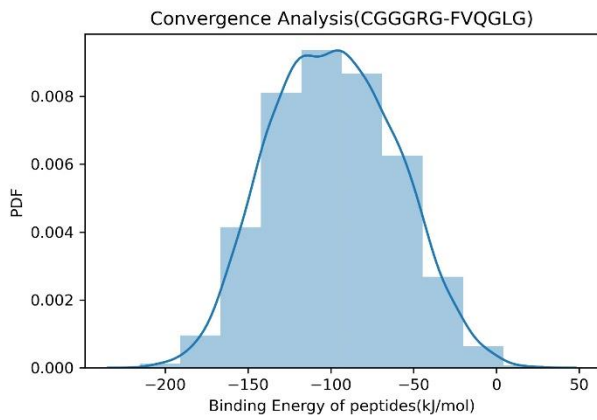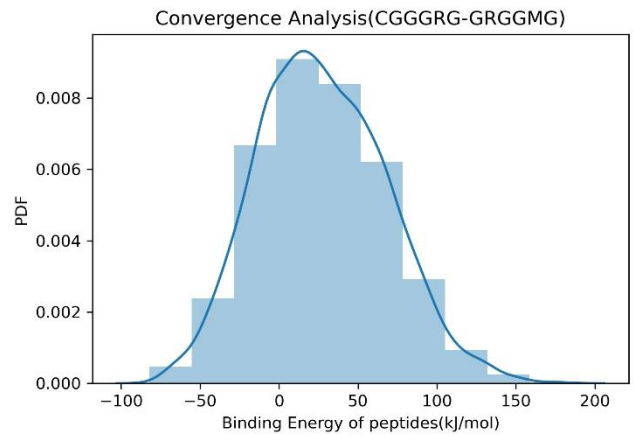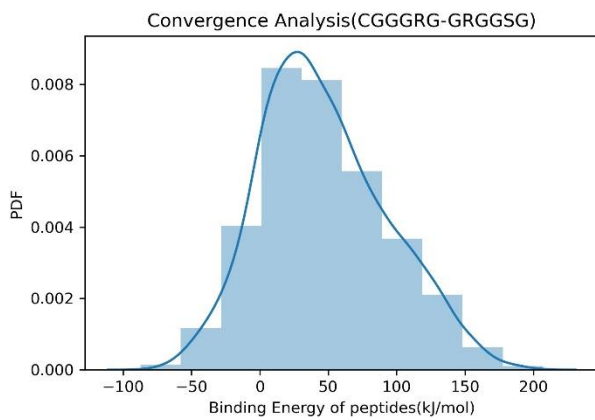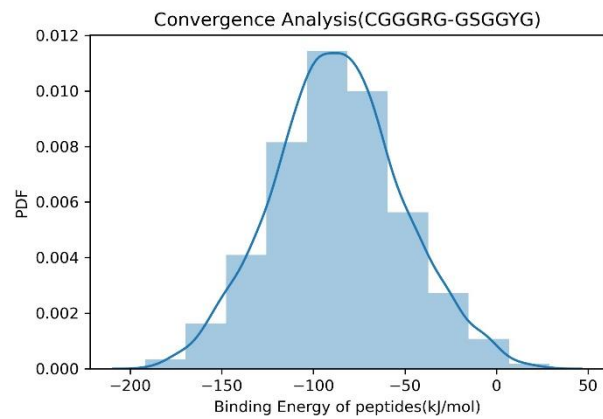



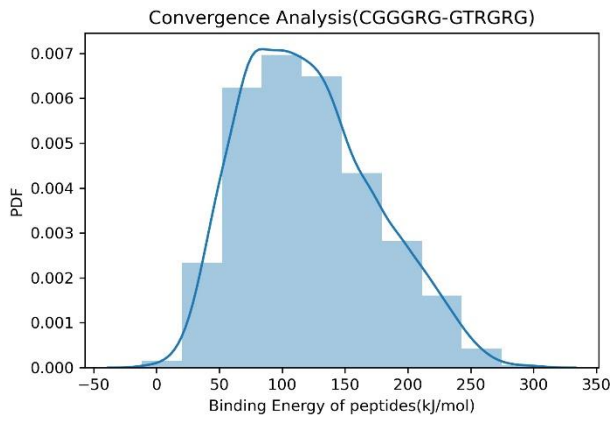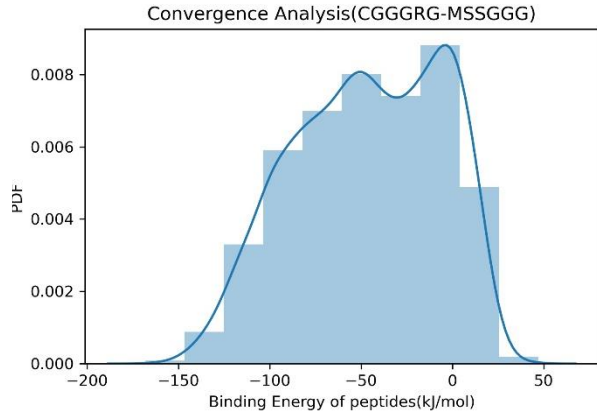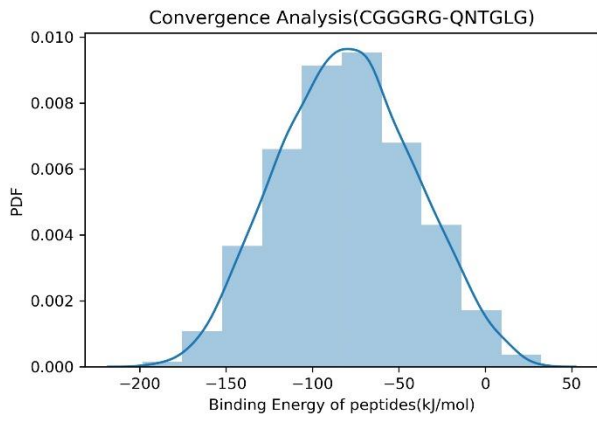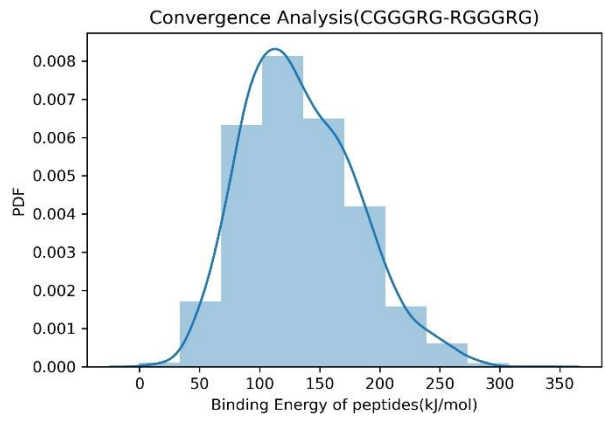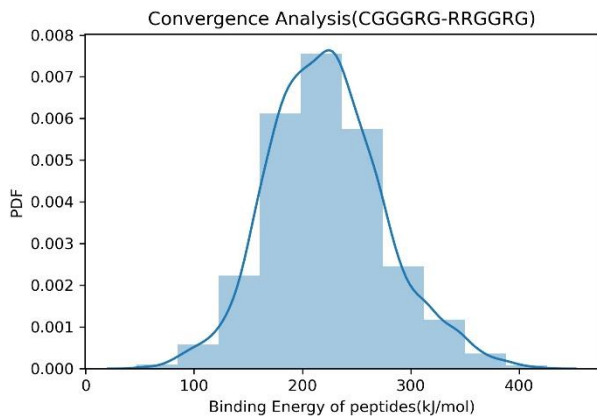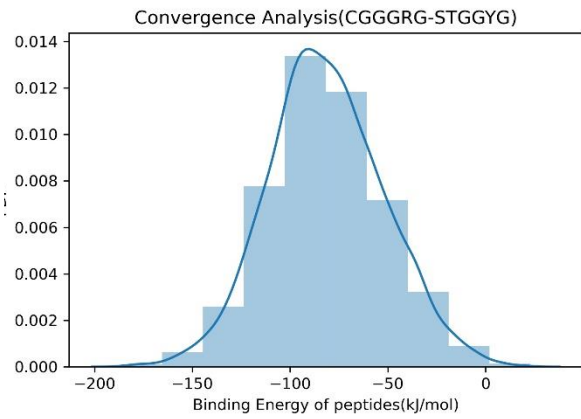

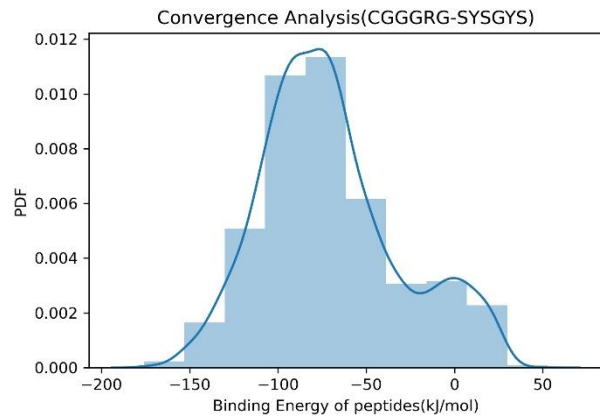

**Figure S5:** Histogram analysis of binding energy distribution of stickers estimated for R244C mutation
